# Supplementary material for: Functional and structural insights into the multicopper oxidase MmcO from Mycobacterium tuberculosis: implications for drug targeting
Source: Frontiers journal article supplement (doi:10.3389/fchem.2025.1565715), 2025-05-27

# ProSA-web

Protein Structure Analysis

Please upload a structure in PDB format:

[HELP](#)

未选择任何文件

Alternatively you can specify a structure by entering its PDB code, chain identifier and NMR model number:

PDB CODE:

PDB CHAIN ID:

PDB MODEL NUMBER:

If you leave the fields for chain id or model number blank, the first chain of the first model found in the PDB file will be analysed.

---

## Results for MmcO.pdb, chain A, model 1 (504 aa)

Overall model quality

[HELP](#)

Z-Score: **-8.31**

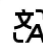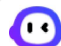

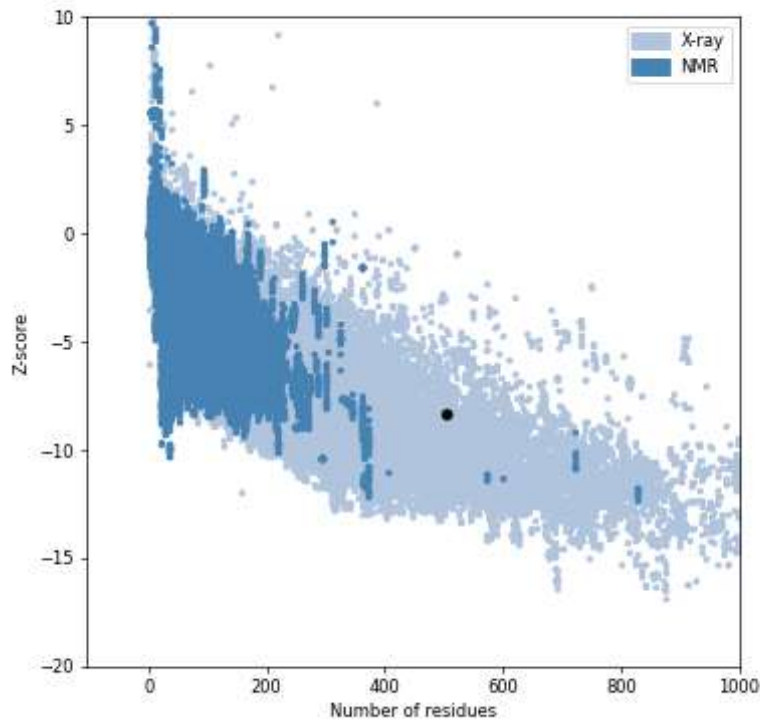

Local model quality

[HELP](#)  
[PNG](#)

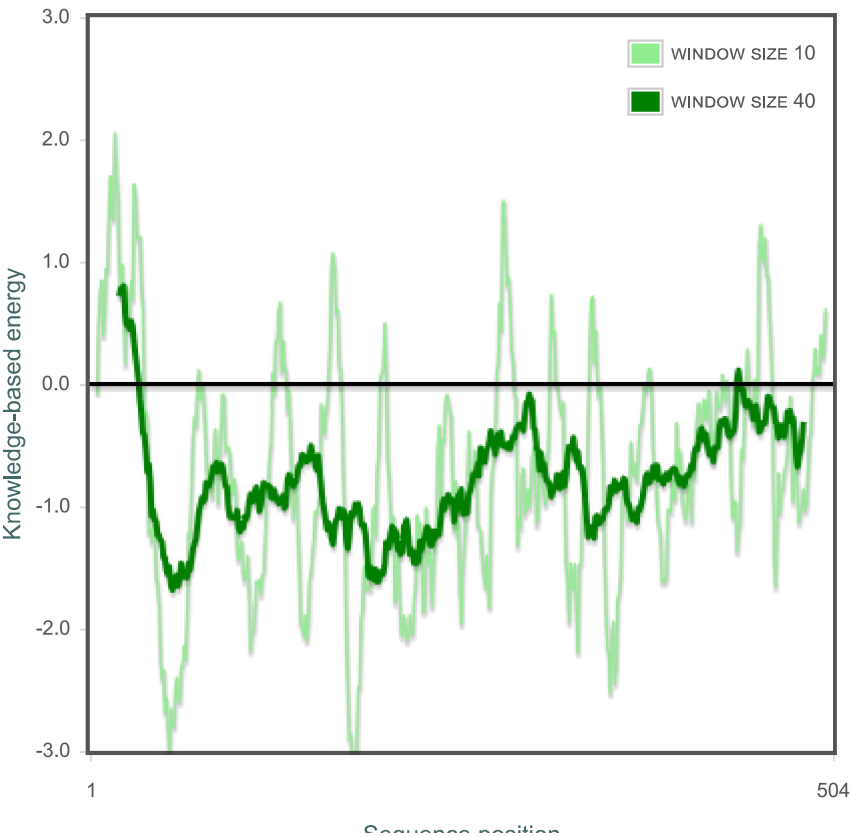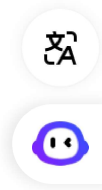

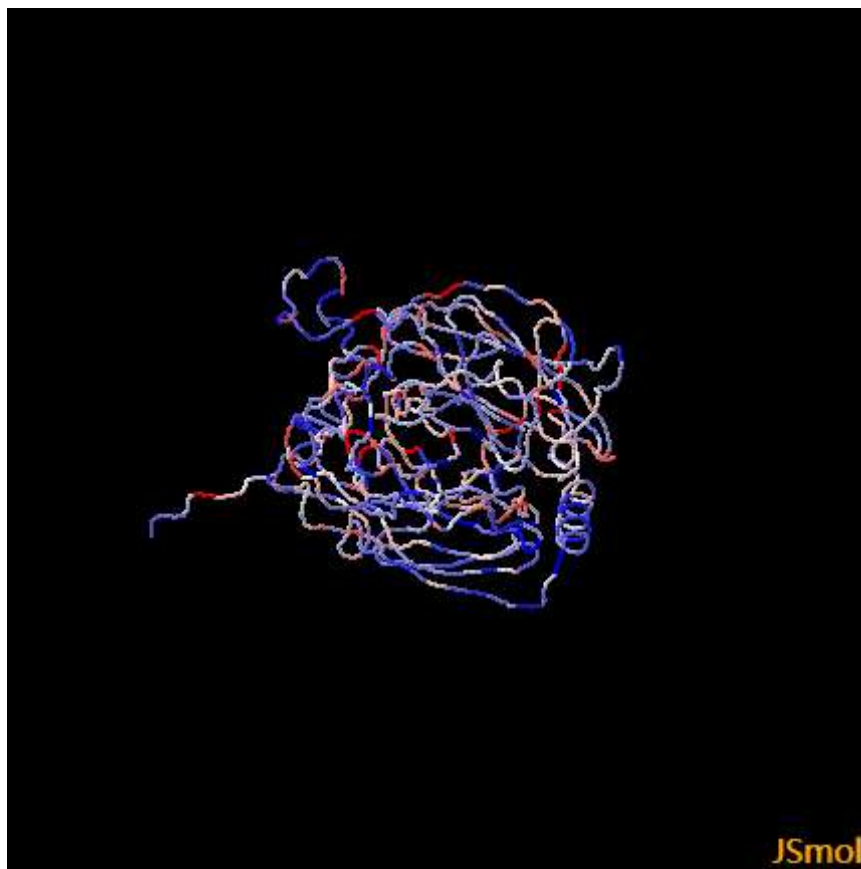

Lowest energy  Highest energy

Please cite the following articles if you publish results using ProSA-web:

- Wiederstein & Sippl (2007)  
ProSA-web: interactive web service for the recognition of errors in three-dimensional structures of proteins.  
*Nucleic Acids Research* 35, W407-W410. [[view](#)]
- Sippl, M.J. (1993)  
Recognition of Errors in Three-Dimensional Structures of Proteins.  
*Proteins* 17, 355-362. [[view](#)]

This site is maintained by Markus Wiederstein. For comments and suggestions please contact [prosa@came.sbg.ac.at](mailto:prosa@came.sbg.ac.at).

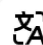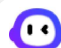

Supplement: Data_Sheet_1.pdf [file Data_Sheet_1.pdf]
